# Supplementary material
Source: PubMed Central journal article supplement (PMC4286108)

**SUPPORTING INFORMATION**

**DOI:** 10.1002/ejoc.201300157

**Title:** Concise Chemoenzymatic Three-Step Total Synthesis of Isosolenopsin through Medium Engineering

**Author(s):** Robert C. Simon, Christine S. Fuchs, Horst Lechner, Ferdinand Zepeck, Wolfgang Kroutil\*

**General Information:**

Unless stated otherwise, reagents and organic solvents were obtained from commercial suppliers and used as received. Toluene, methanol and acetonitrile used for anhydrous reactions were dried over appropriate molecular sieves (4Å for toluene, 3Å for MeOH and MeCN) for at least 48 hours. THF used for anhydrous reactions was distilled from potassium/benzophenone directly prior to use. For anhydrous reactions, flasks were oven-dried at 120 °C over night and flushed with dry nitrogen just before use. The reactions were carried out with standard *Schlenk* techniques under N<sub>2</sub> atmosphere.

## Initial Enzyme Testing (Selected Results)

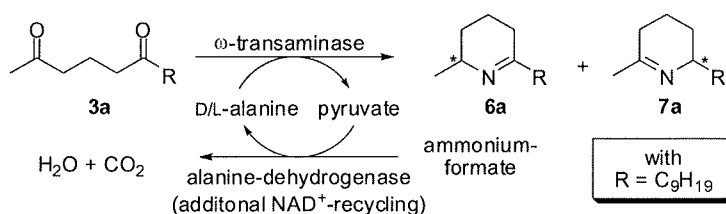

| entry | enzyme                           | 50 mM <b>3a</b> , 5 vol % toluene |               |               | 25 mM <b>3a</b> , 10 vol % toluene |               |               |
|-------|----------------------------------|-----------------------------------|---------------|---------------|------------------------------------|---------------|---------------|
|       |                                  | <b>3a</b> [%]                     | <b>6a</b> [%] | <b>7a</b> [%] | <b>3a</b> [%]                      | <b>6a</b> [%] | <b>7a</b> [%] |
| 1     | <i>Chromobacterium violaceum</i> | > 99                              | < 1           | --            | 99.5                               | 0.5           | --            |
| 2     | <i>Bacillus megaterium</i>       | 98.9                              | 1.1           | --            | 99.6                               | 0.4           | --            |
| 3     | <i>Paracoccus denitrificans</i>  | > 99                              | < 1           | --            | 99.4                               | 0.6           | --            |
| 4     | <i>Vibrio fluvialis</i>          | 98.5                              | 1.5           | --            | 98.4                               | 1.6           | --            |
| ----- |                                  |                                   |               |               |                                    |               |               |
| 5     | <i>Arthrobacter</i> sp.          | 80.2                              | 19.8          | --            | 83.6                               | 16.4          | --            |
| 6     | <i>Aspergillus terreus</i>       | > 99                              | < 1           | --            | 98.8                               | 1.2           | --            |
| 7     | <i>Hyphomonas neptunium</i>      | 71.5                              | 29.5          | --            | 75.6                               | 24.5          | --            |

**Table S1.** Results of the enzyme testing. Conditions: 25 (6 mg/mL) respective 50 mM (12 mg/mL) diketone **3a** in the presence of various vol% of toluene, 1 mM PLP, 1 mM NAD<sup>+</sup>, 150 mM ammonium formate, 250 mM D- respective L-alanine, 11 U FDH, 12 U AlaDH. Reactions were run at 30 °C for 24 hours in an Eppendorf orbital shaker at 600 rpm with the tubes in horizontal position. Conversions were determined by achiral GC analysis.

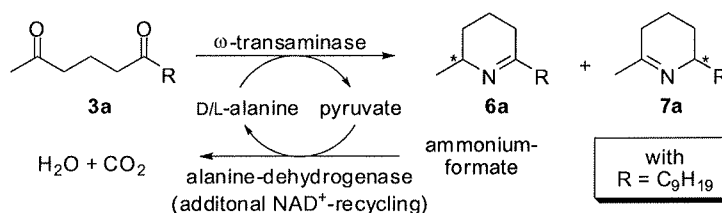

| entry | enzyme                           | 10 vol% THF   |               |               | 10 vol% MeCN  |               |               | 10 vol% DME   |               |               | 10 vol% Heptane |               |               |
|-------|----------------------------------|---------------|---------------|---------------|---------------|---------------|---------------|---------------|---------------|---------------|-----------------|---------------|---------------|
|       |                                  | <b>3a</b> [%] | <b>6a</b> [%] | <b>7a</b> [%] | <b>3a</b> [%] | <b>6a</b> [%] | <b>7a</b> [%] | <b>3a</b> [%] | <b>6a</b> [%] | <b>7a</b> [%] | <b>3a</b> [%]   | <b>6a</b> [%] | <b>7a</b> [%] |
| 1     | <i>Chromobacterium violaceum</i> | > 99          | --            | --            | > 99          | --            | --            | 99.3          | 0.7           | --            | 98              | 2.0           | --            |
| 2     | <i>Bacillus megaterium</i>       | > 99          | --            | --            | 99.1          | 0.9           | --            | 99.6          | 0.4           | --            | 94.7            | 5.3           | --            |
| 3     | <i>Paracoccus denitrificans</i>  | > 99          | --            | --            | > 99          | --            | --            | 99.6          | 0.4           | --            | 98              | 2.0           | --            |
| 4     | <i>Vibrio fluvialis</i>          | > 99          | --            | --            | 99.6          | 0.4           | --            | 98.9          | 1.1           | --            | 96.4            | 3.6           | --            |
| ----- |                                  |               |               |               |               |               |               |               |               |               |                 |               |               |
| 5     | <i>Arthrobacter</i> sp.          | 96.9          | 3.1           | --            | 98.5          | 1.5           | --            | 74.5          | 25.5          | --            | 59.6            | 40.4          | --            |
| 6     | <i>Aspergillus terreus</i>       | > 99          | --            | --            | 98.9          | 1.1           | --            | 98.4          | 1.6           | --            | 98.2            | 1.8           | --            |
| 7     | <i>Hyphomonas neptunium</i>      | > 99          | --            | --            | 87.9          | 12.1          | --            | 61.6          | 38.4          | --            | 66.1            | 33.9          | --            |

**Table S2.** Results of the enzyme testing. Conditions: 25 mM (6 mg/mL) diketone **3a** in the presence of various organic solvents (10 vol%), 1 mM PLP, 1 mM NAD<sup>+</sup>, 150 mM ammonium formate, 250 mM D- respective L-alanine, 11 U FDH, 12 U AlaDH. Reactions were run at 30 °C for 24 hours in an Eppendorf orbital shaker at 600 rpm with the tubes in horizontal position. Conversions were determined via achiral GC analysis.

## GC-MS Spectra

## GS-MS spectrum of Nonane-2,6-dione (3a)

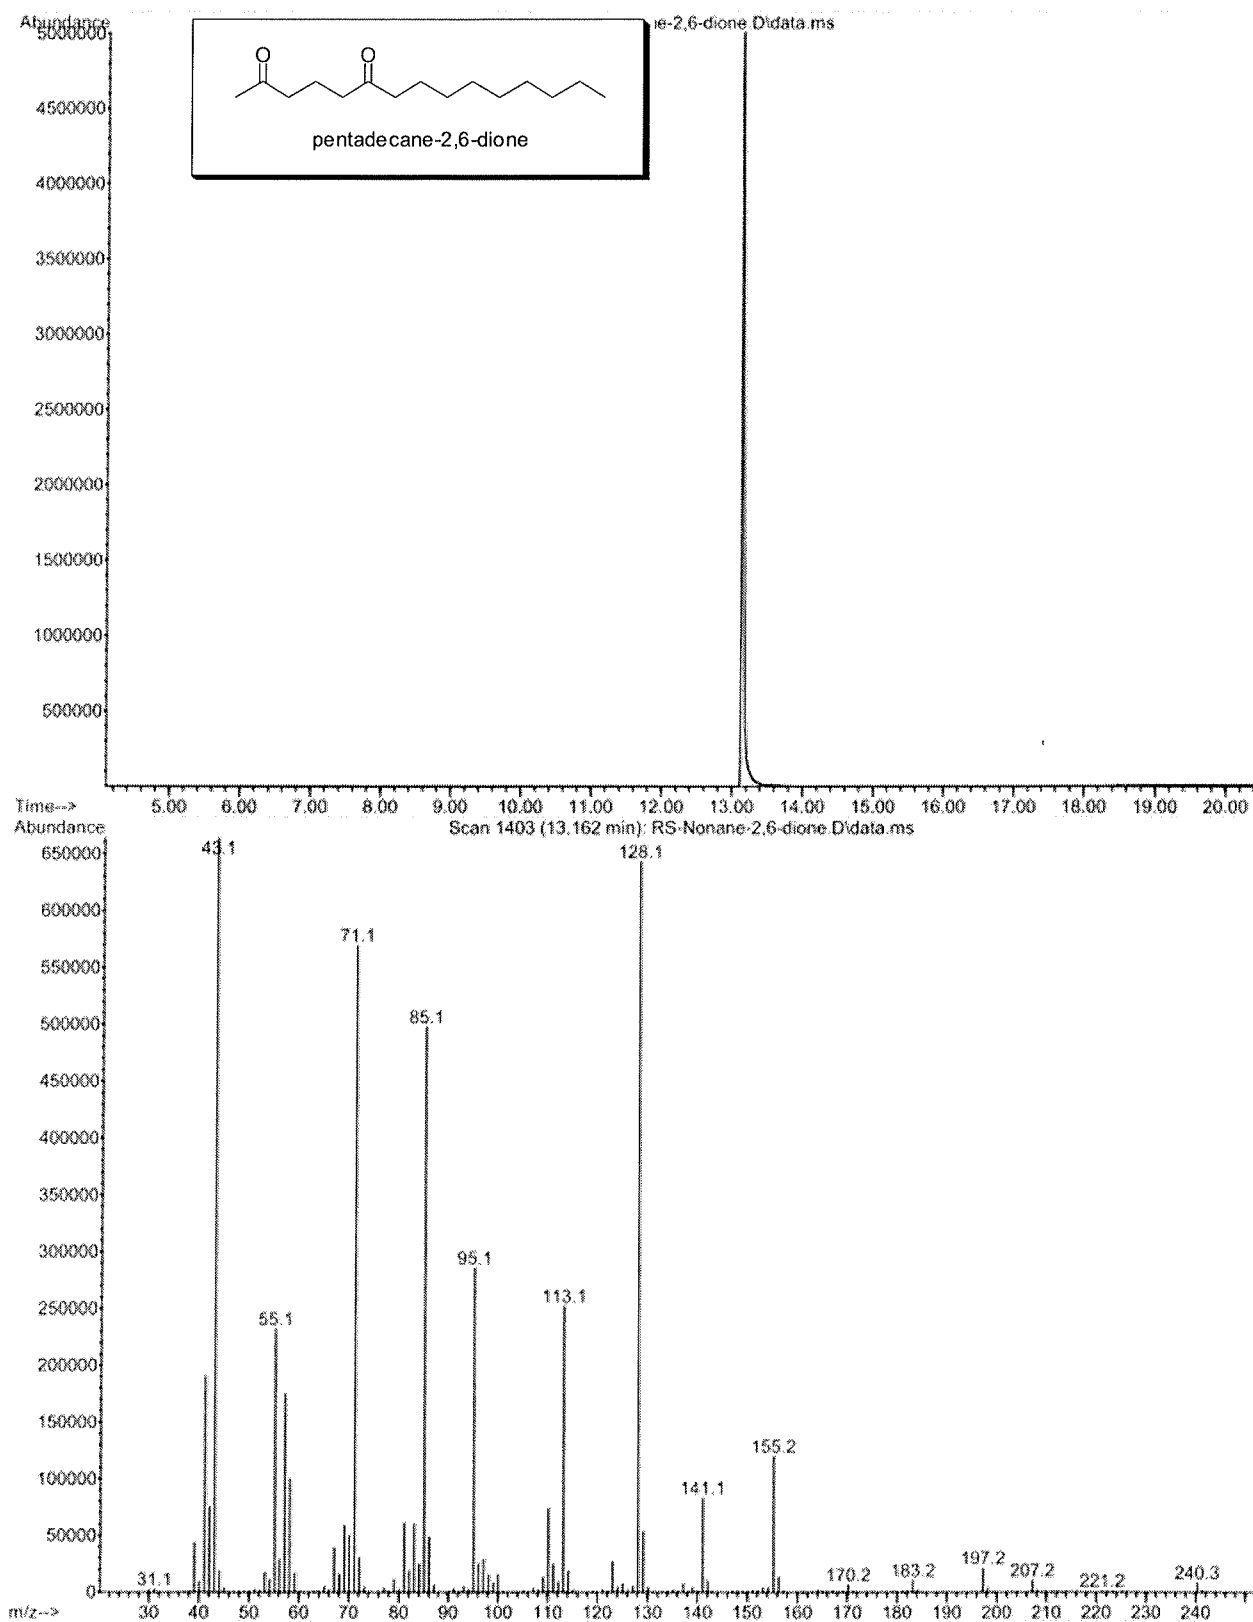

## GC-MS spectrum of piperidine 6a

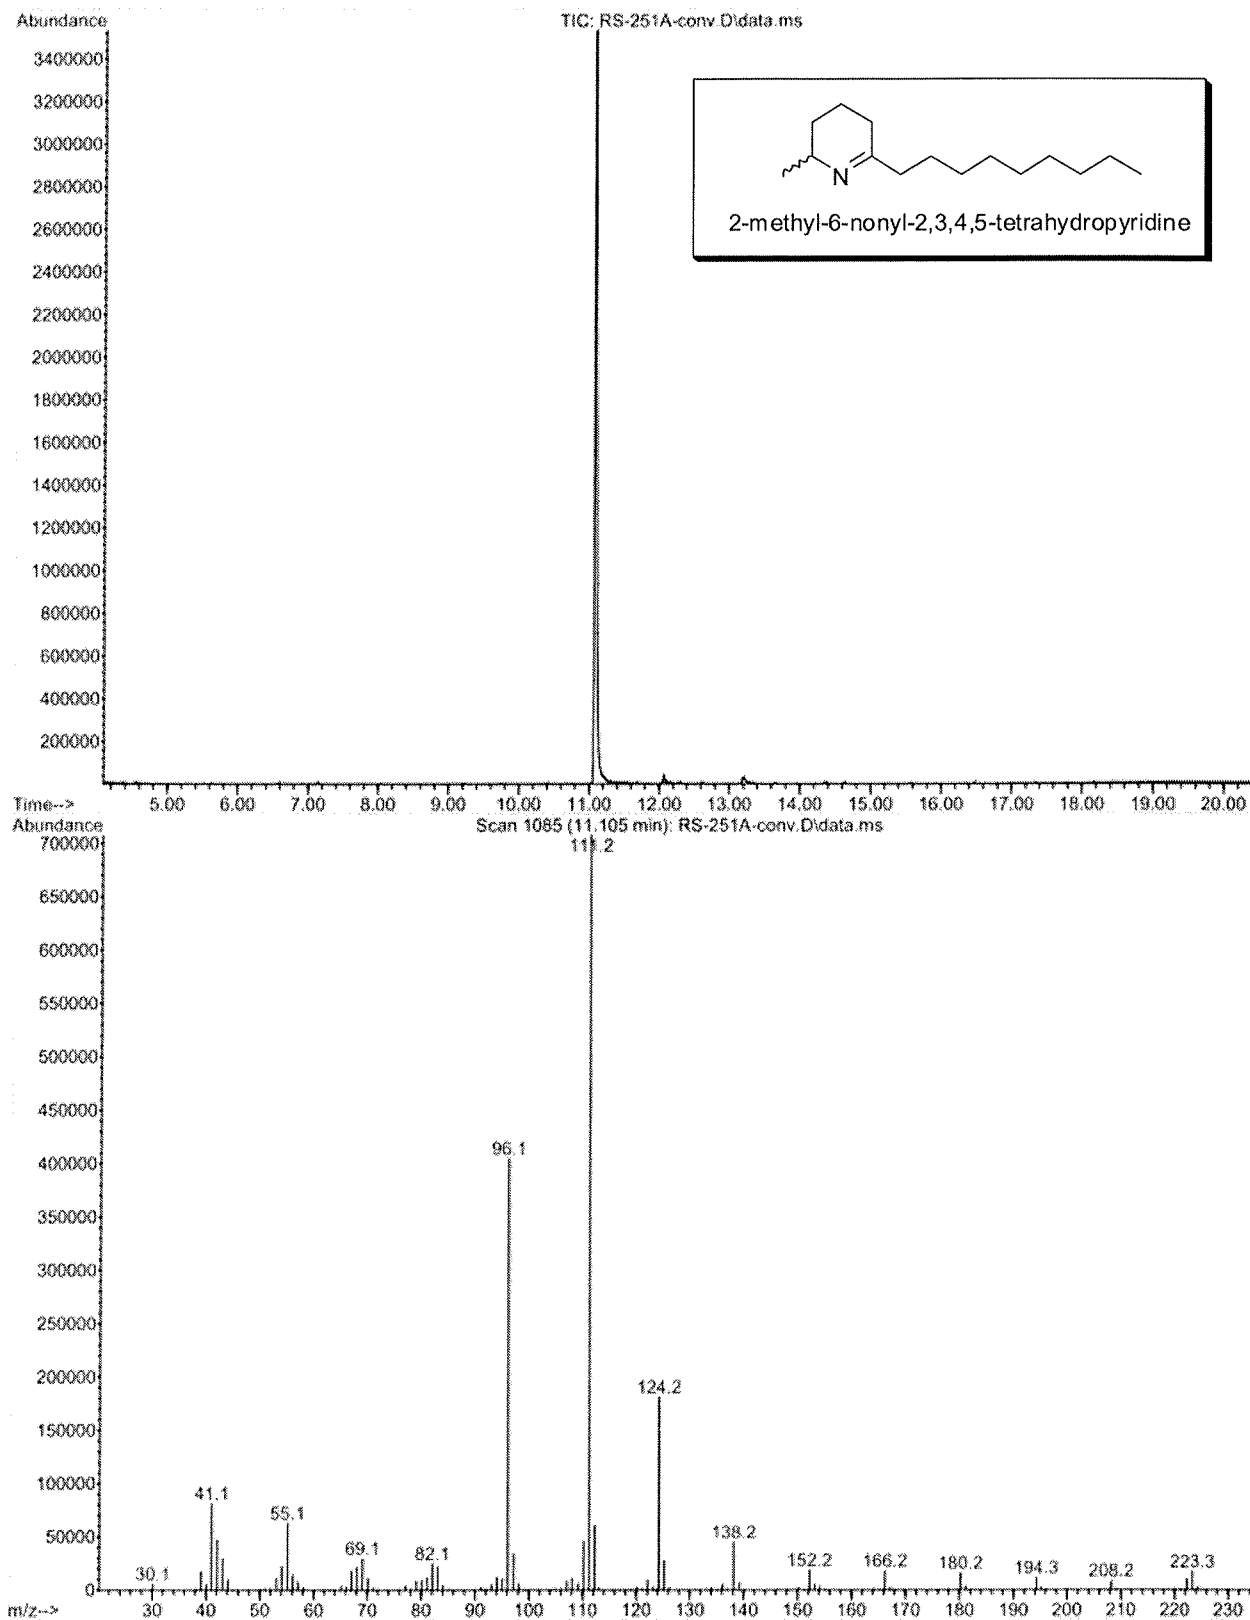

## GC-MS spectrum of 2-Methyl-6-nonylpiperidine (Isosolenopsin [1a])

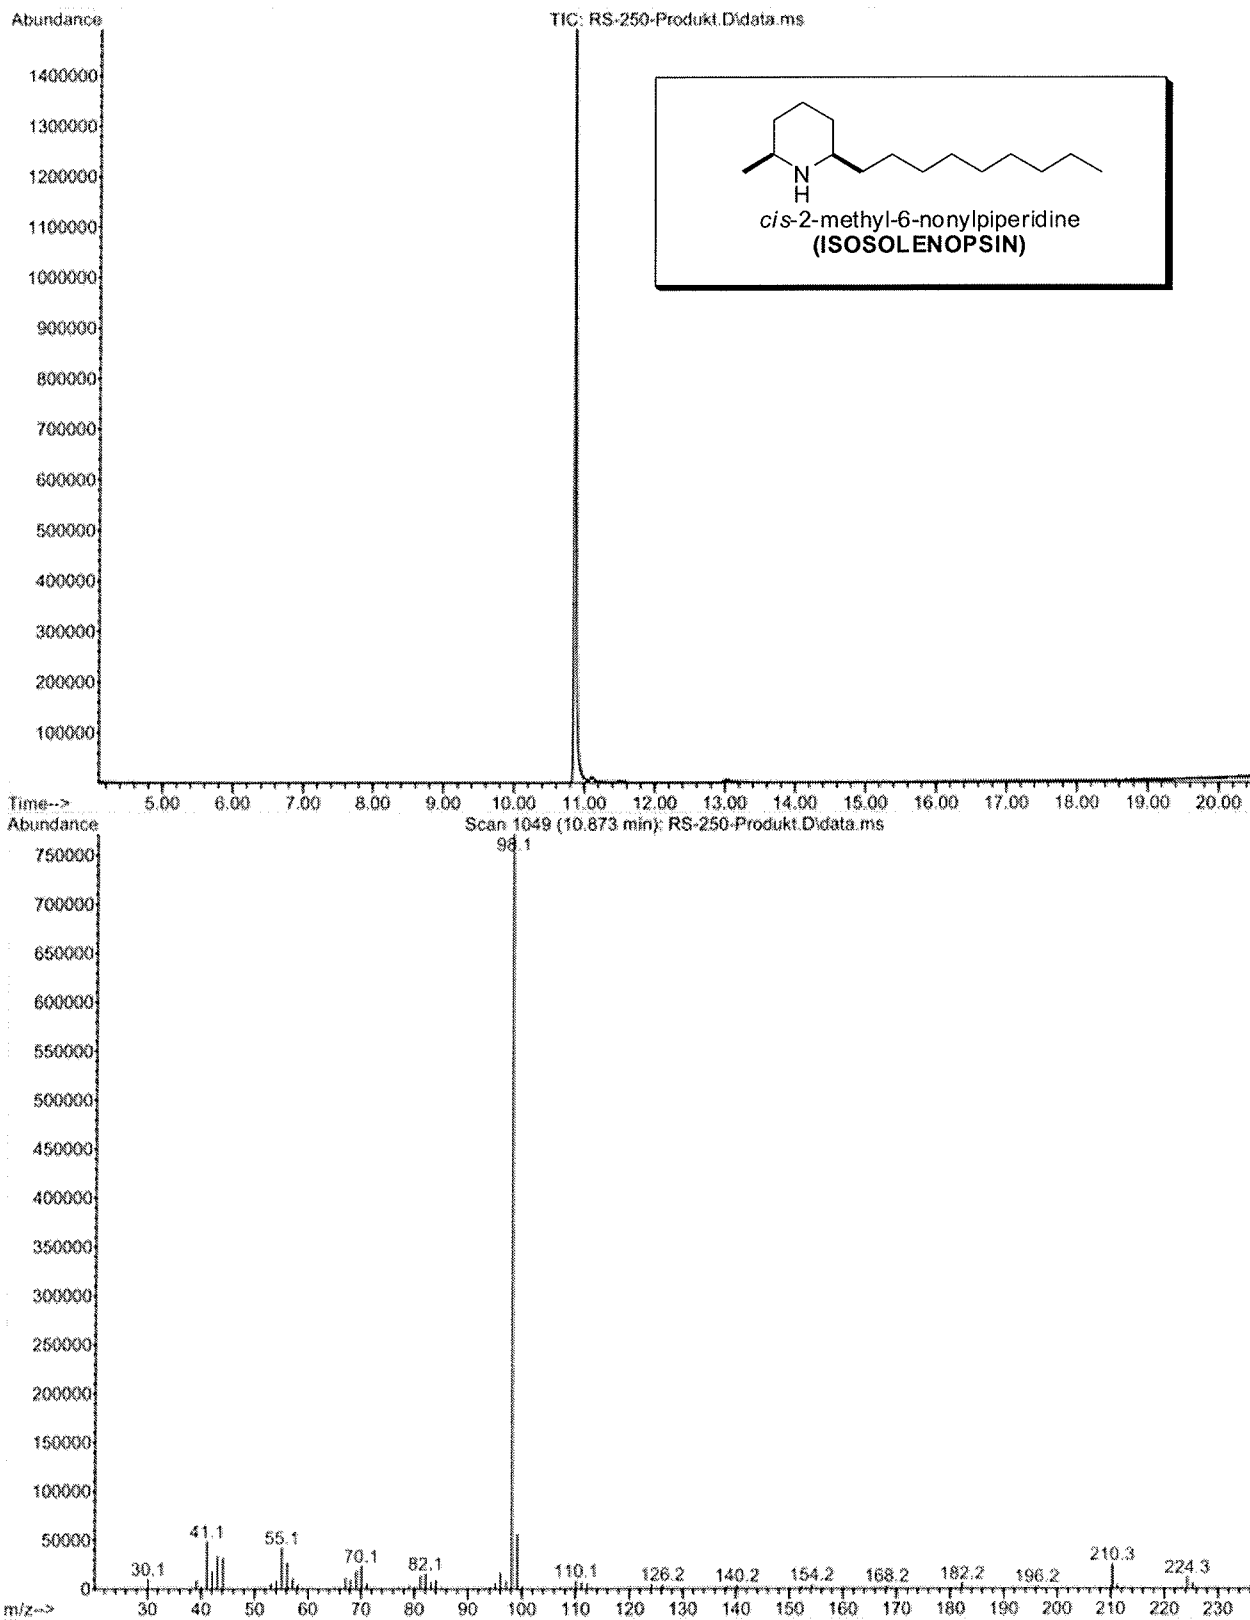

## 2 NMR Spectra

<sup>1</sup>H-NMR of Pentadecane-2,6-dione (3b)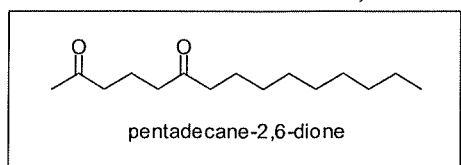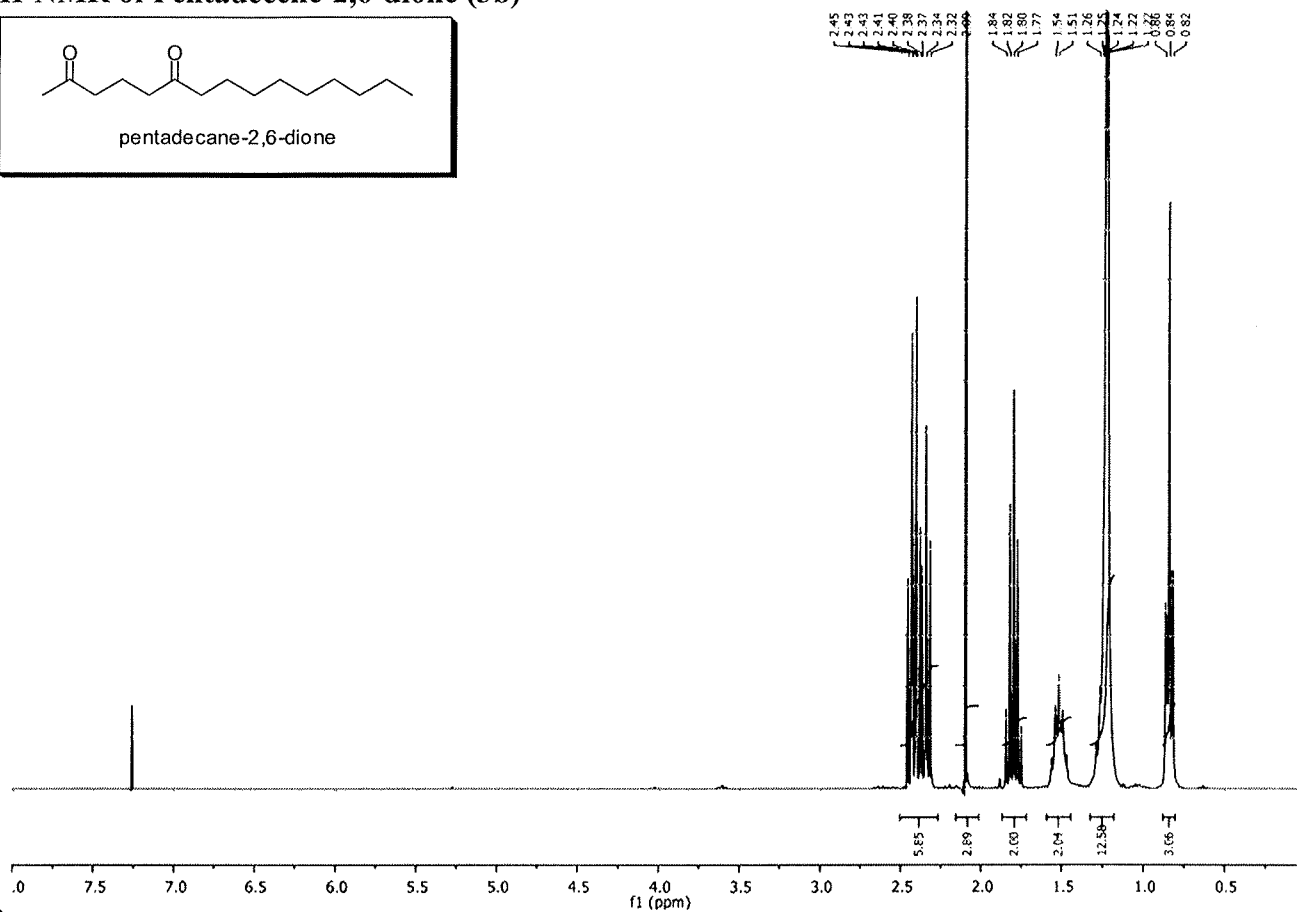<sup>13</sup>C-NMR of Pentadecane-2,6-dione (3b)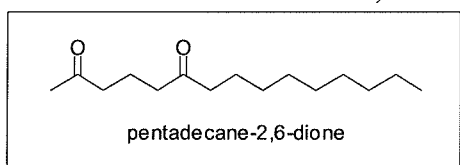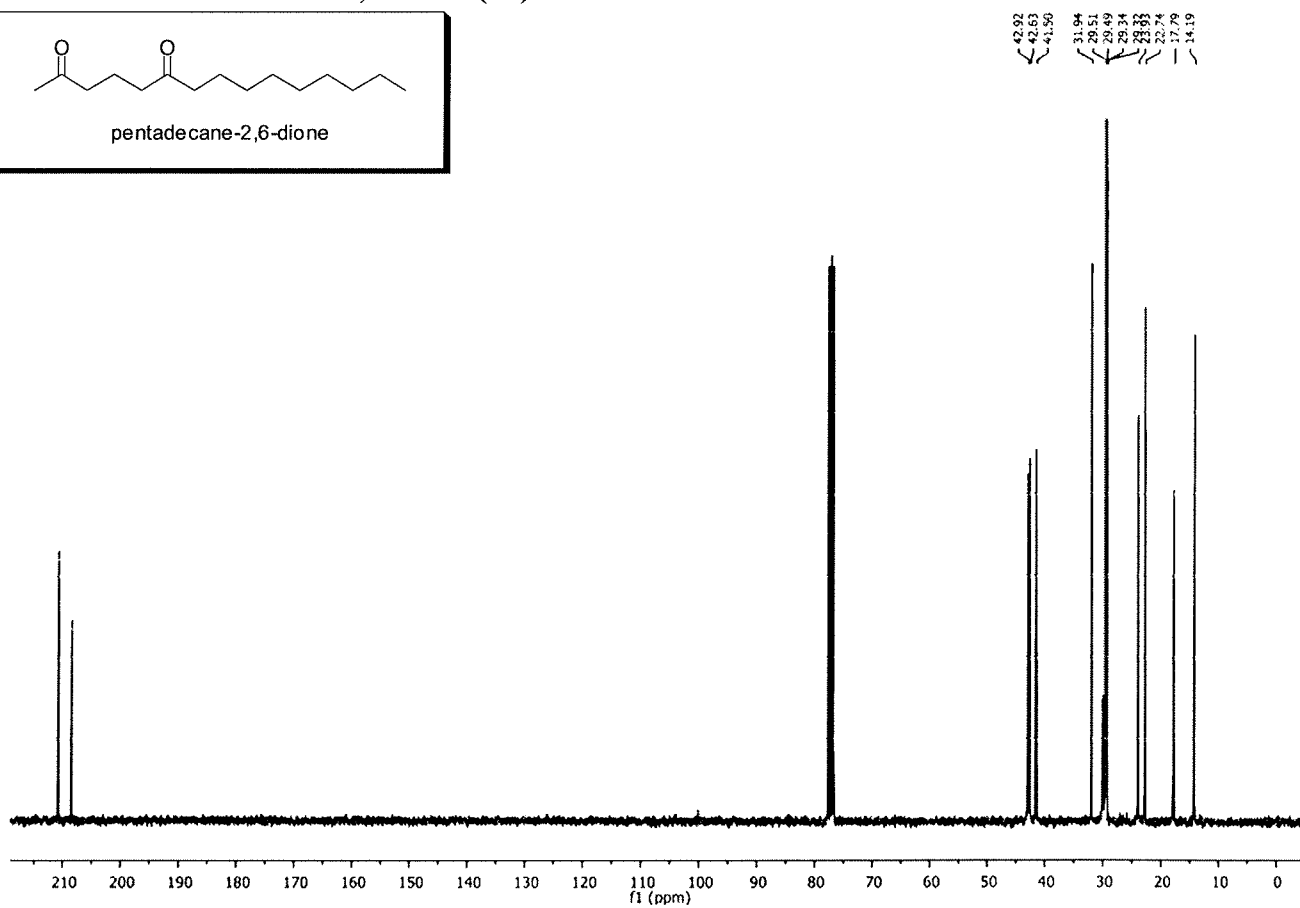

### $^1\text{H}$ , $^1\text{H}$ -COSY of Pentadecane-2,6-dione (3b)

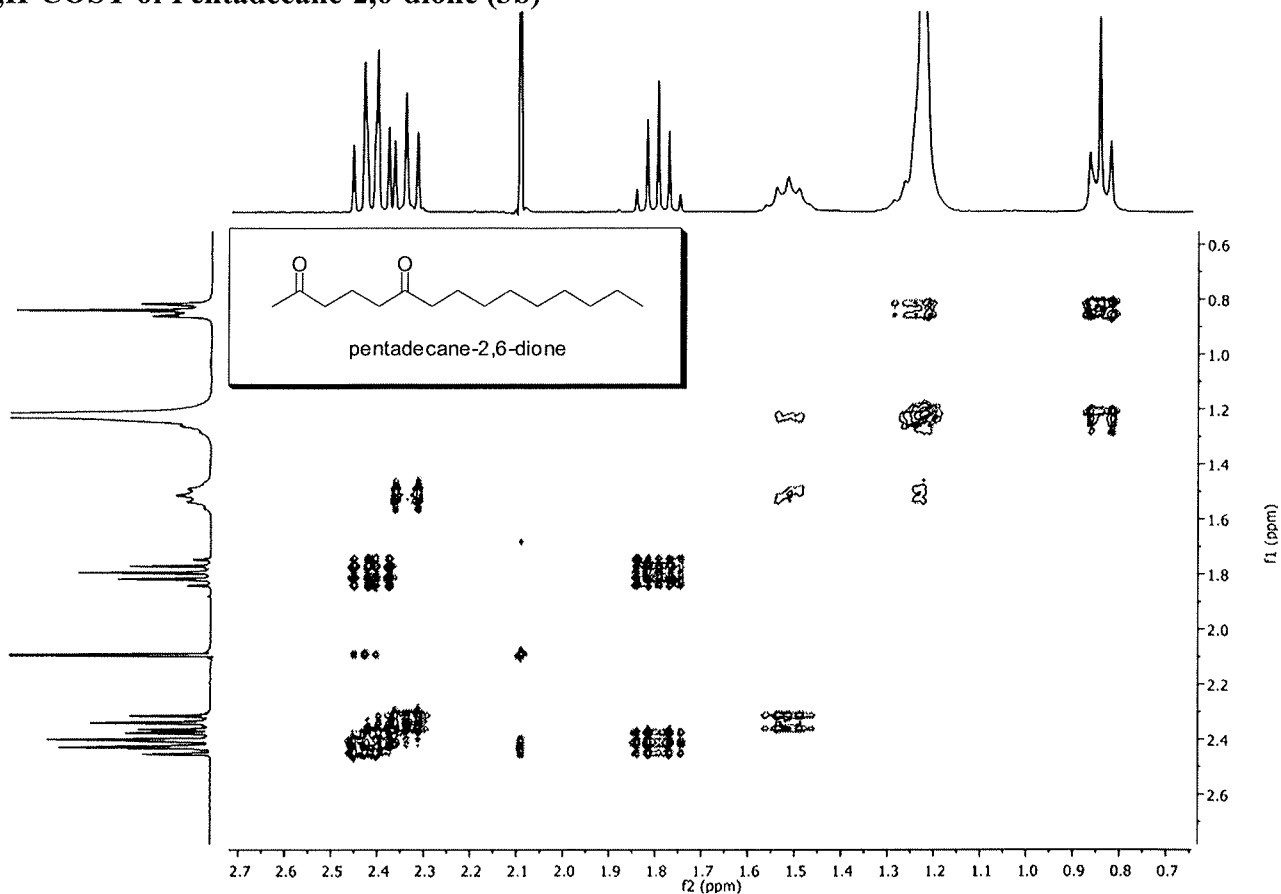

### HSQC of Pentadecane-2,6-dione (3b)

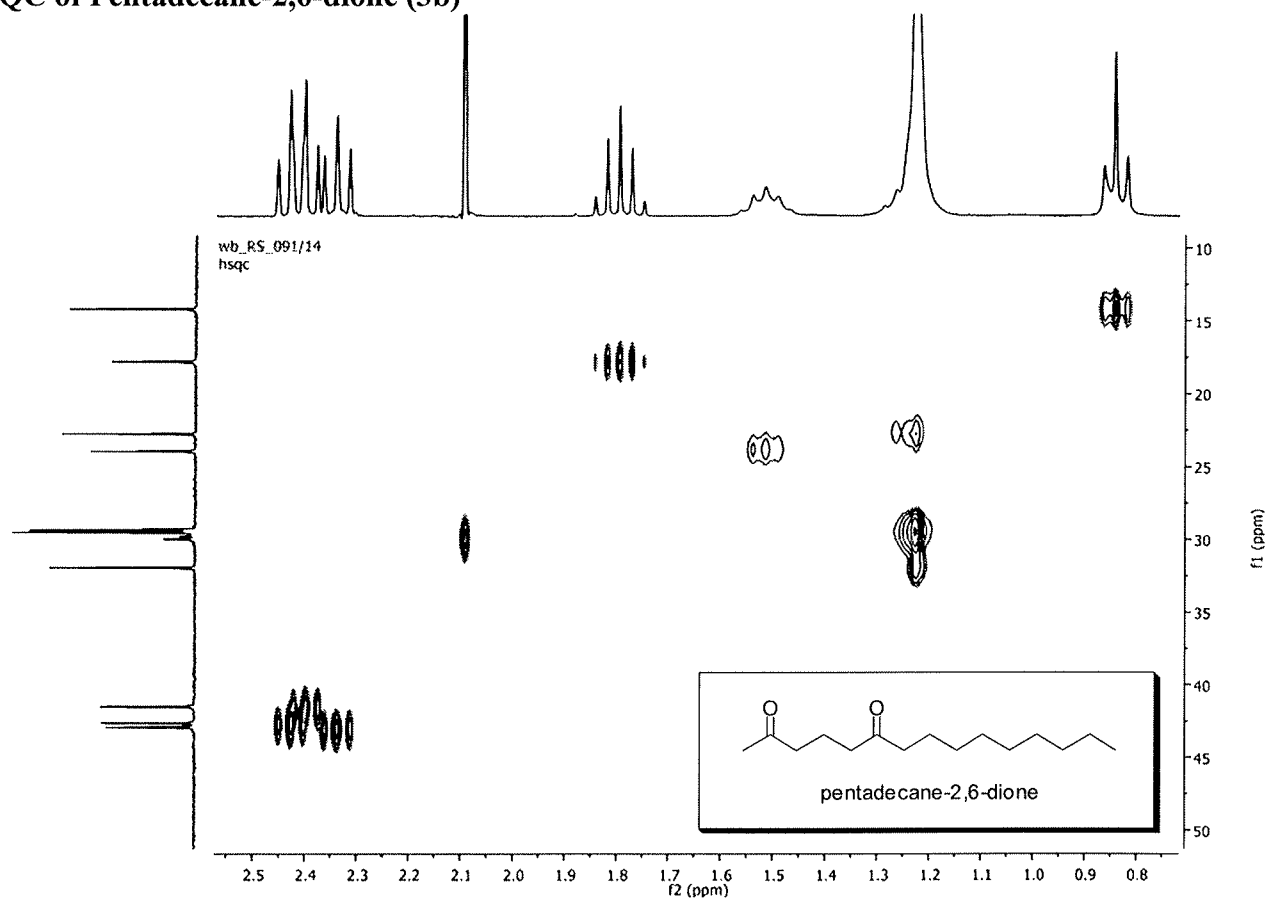



**<sup>1</sup>H-NMR of 2-Methyl-6-nonylpiperidine (Isosolenopsin [1a])**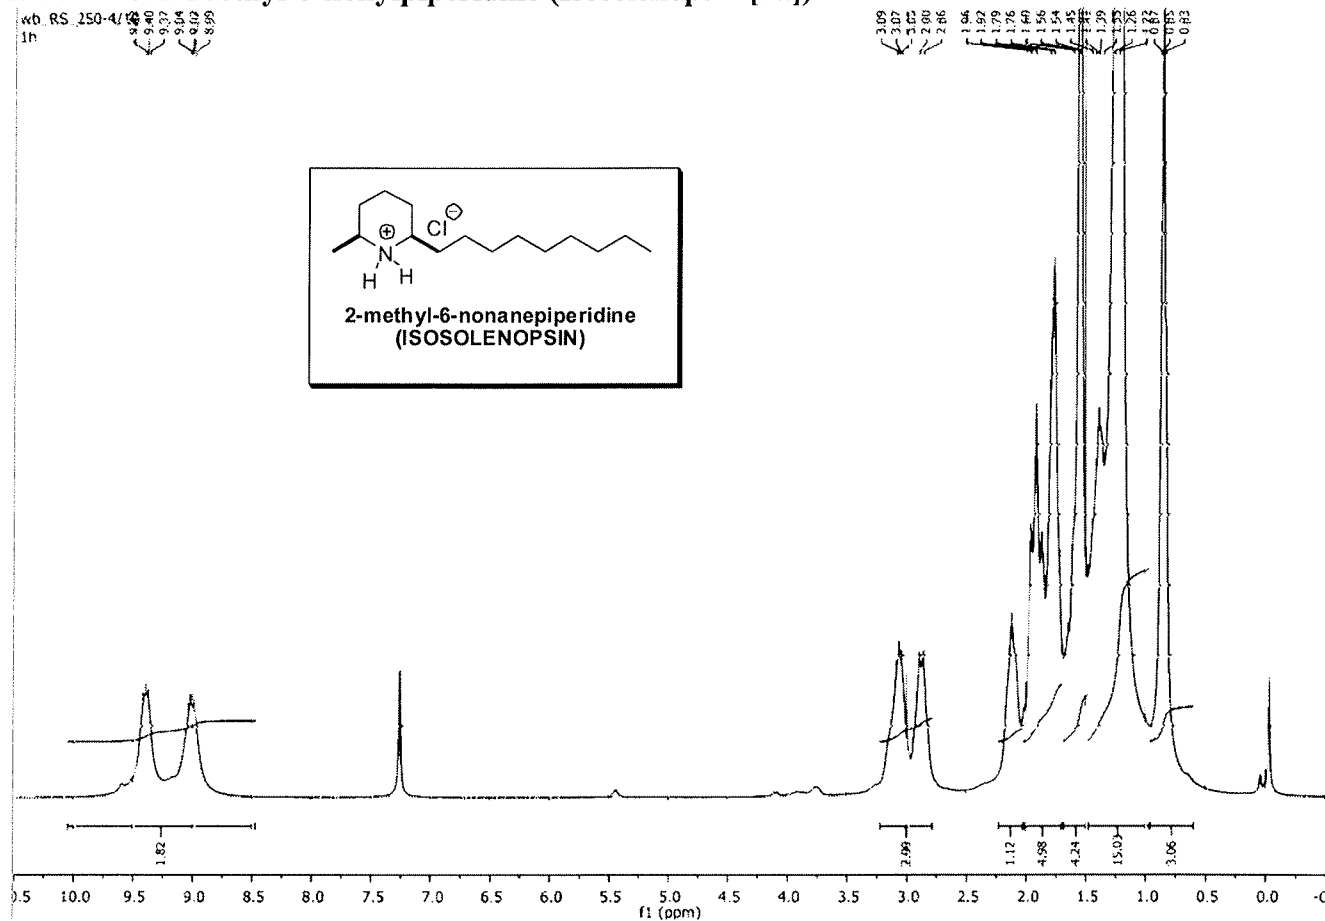**<sup>13</sup>C-NMR of 2-Methyl-6-nonylpiperidine (Isosolenopsin [1a])**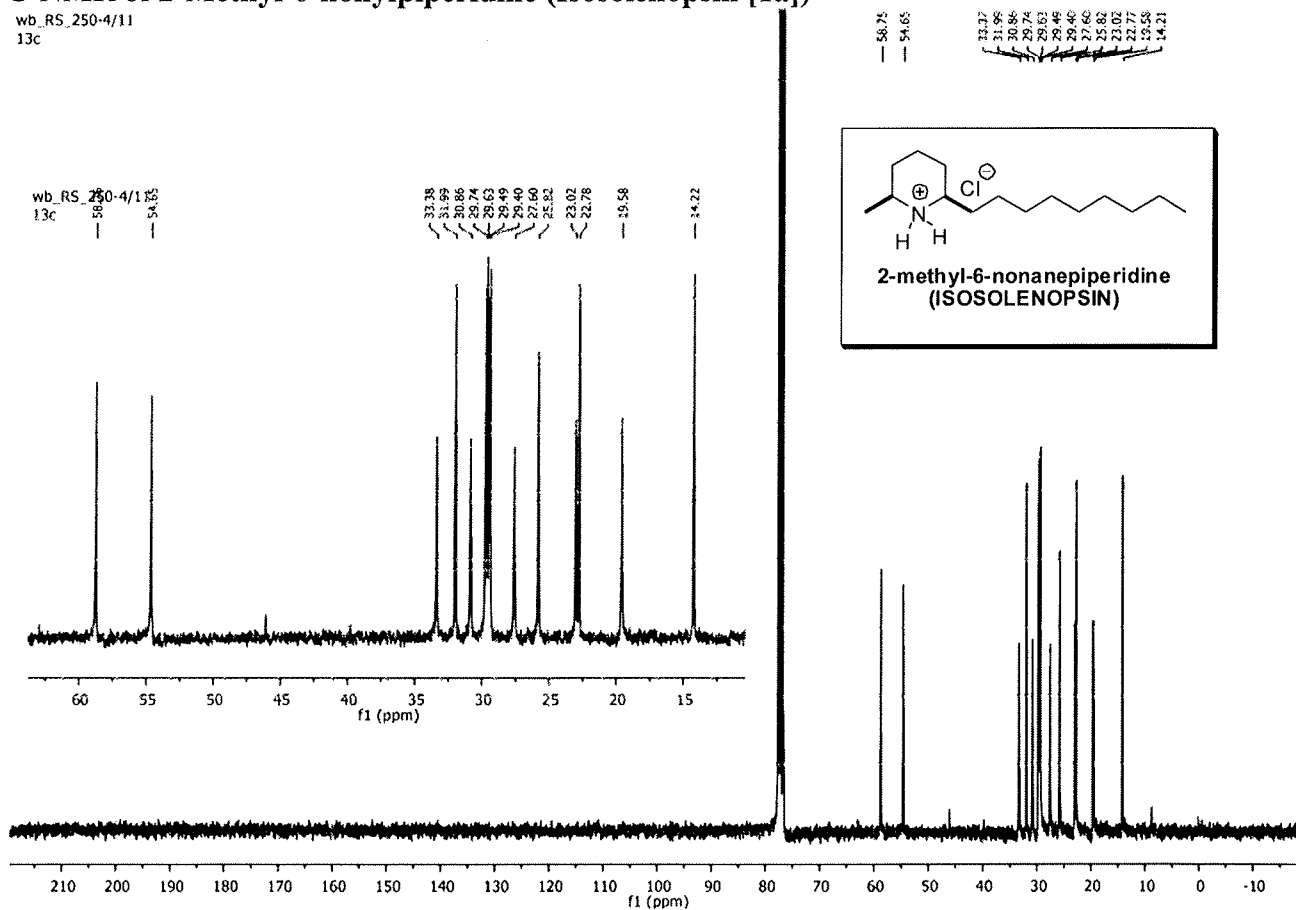

### H,H-COSY NMR of 2-Methyl-6-nonylpiperidine (Isosolenopsin [1a])

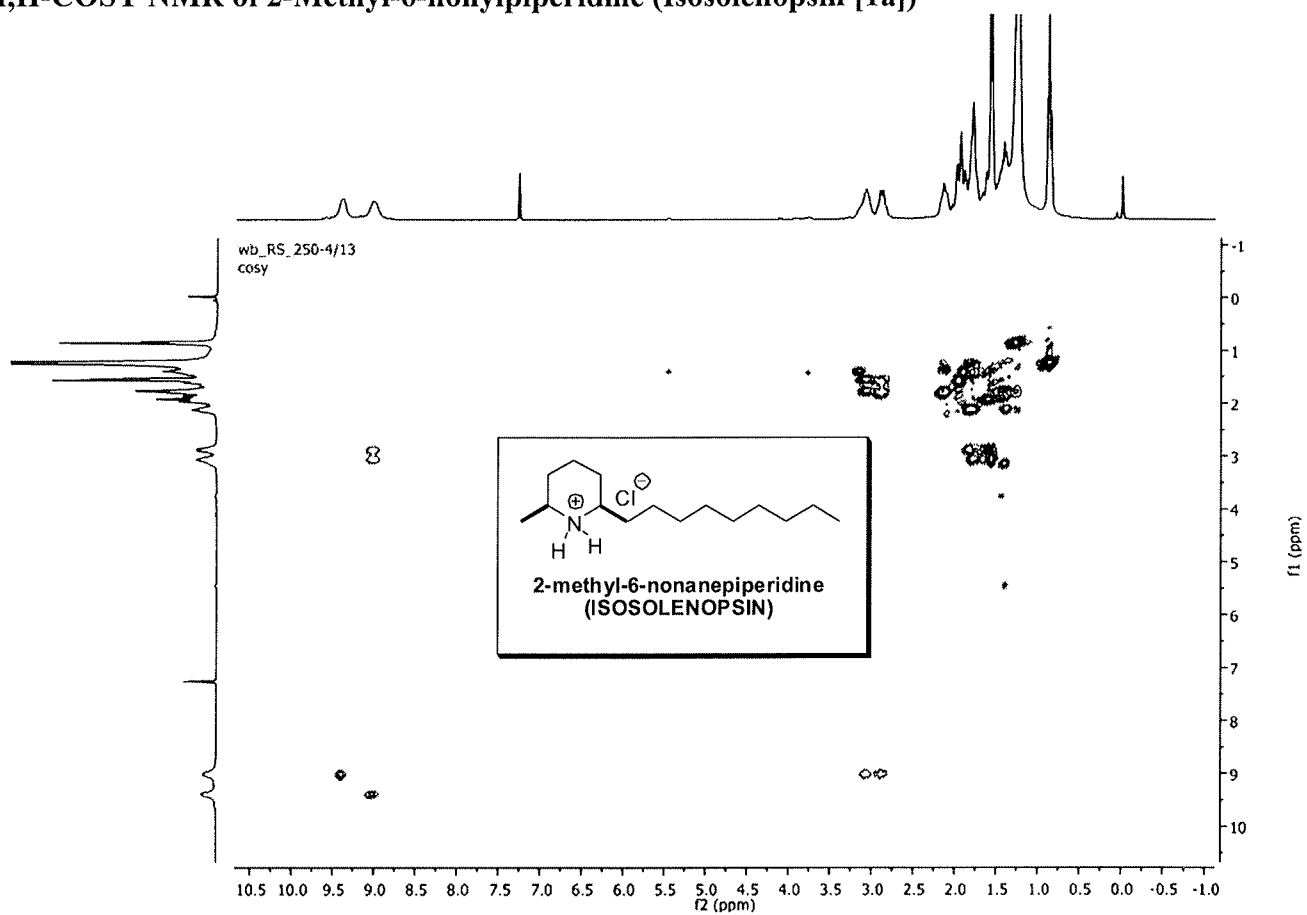

### HSQC NMR of 2-Methyl-6-nonylpiperidine (Isosolenopsin [1a])

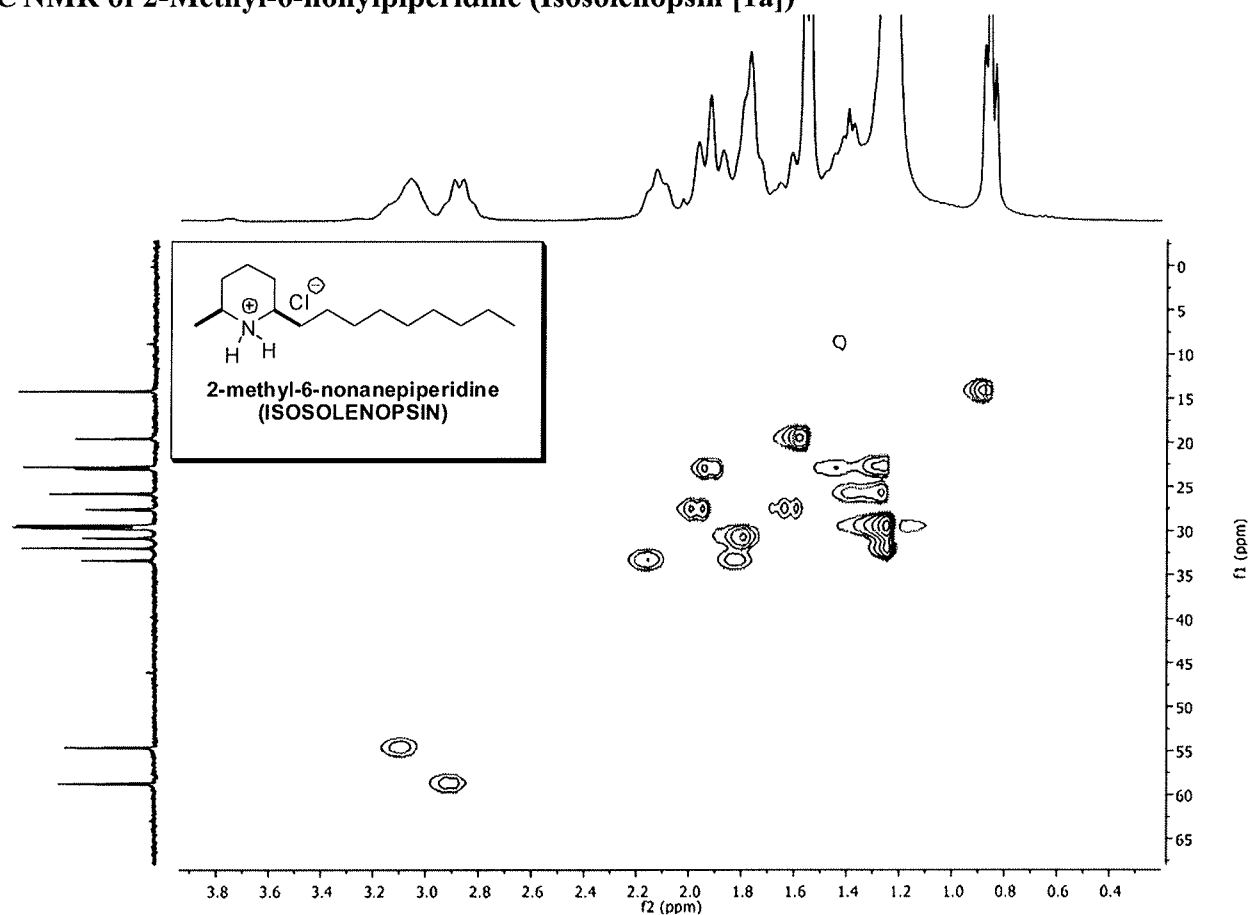

Supplement: ejoc2013-3397-SD1.pdf [file ejoc2013-3397-SD1.pdf]
